# Supplementary material for: Tissue accumulation of neutrophil extracellular traps mediates muscle hyperalgesia in a mouse model
Source: PubMed Central journal article supplement (PMC8907237; doi:10.1038/s41598-022-07916-8), 2022-03-09

**Tissue accumulation of neutrophil extracellular traps mediates muscle hyperalgesia in a mouse model**

Kazuaki Suzuki<sup>1,2</sup>, Masahiro Tsuchiya<sup>3\*</sup>, Shinichiro Yoshida<sup>1</sup>, Kazumi Ogawa<sup>1,2</sup>, Weijian Chen<sup>2</sup>, Makoto Kanzaki<sup>2</sup>, Tadahisa Takahashi<sup>1,2</sup>, Ryo Fujita<sup>1,2</sup>, Yuqing Li<sup>1,2</sup>, Yutaka Yabe<sup>1</sup>, Toshimi Aizawa<sup>1</sup>, and Yoshihiro Hagiwara<sup>1</sup>

<sup>1</sup> Department of Orthopedic Surgery, Graduate School of Medicine, Tohoku University, Sendai, Japan

<sup>2</sup> Graduate School of Biomedical Engineering, Tohoku University, Sendai, Japan

<sup>3</sup> Department of Nursing, Tohoku Fukushi University, Sendai, Miyagi, Japan

*\*Corresponding author*

Masahiro Tsuchiya, DDS., PhD.

Department of Nursing, Tohoku Fukushi University

6-149-1 Kunimi-ga-oka, Sendai 981-3201, Japan

Tel: +81-22-728-6049, Fax: +81-22-233-3113

E-mail: [tsuchiya-thk@umin.ac.jp](mailto:tsuchiya-thk@umin.ac.jp)

Figure 1

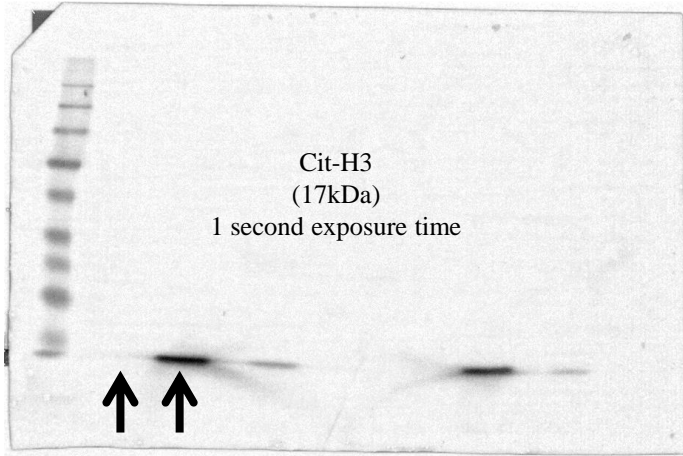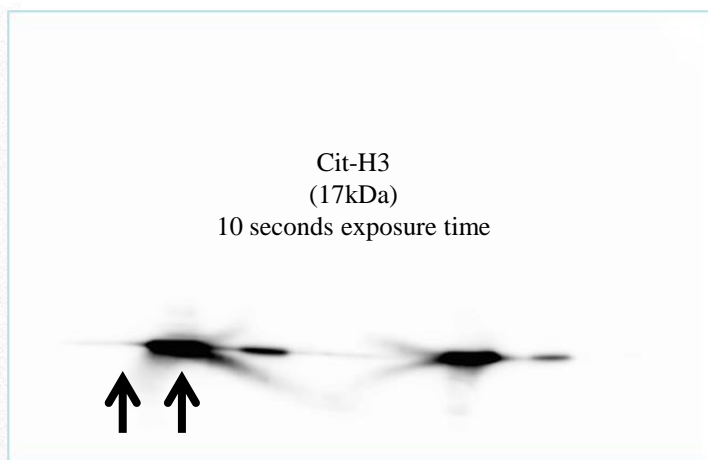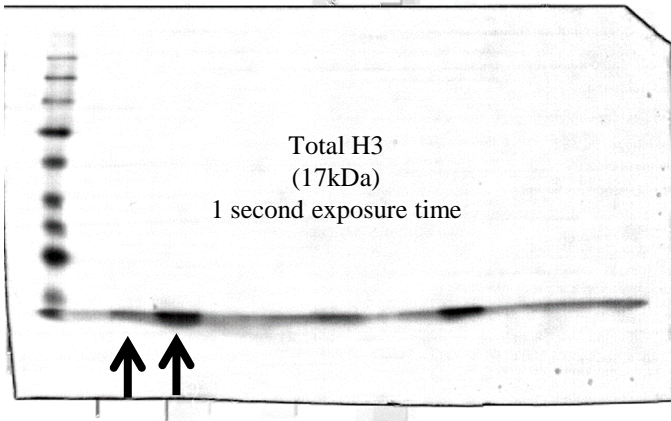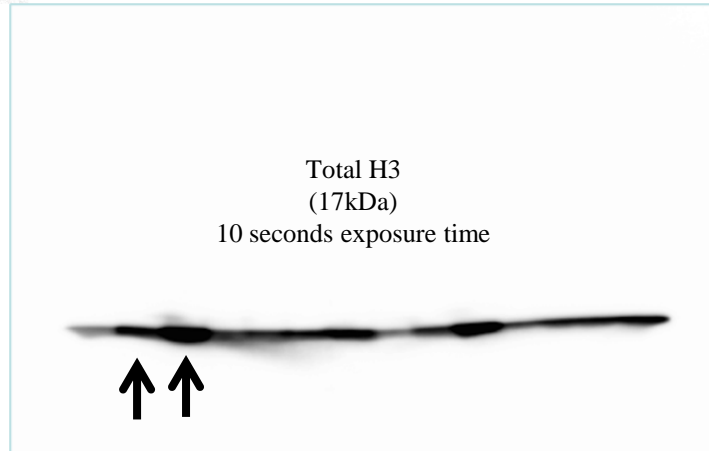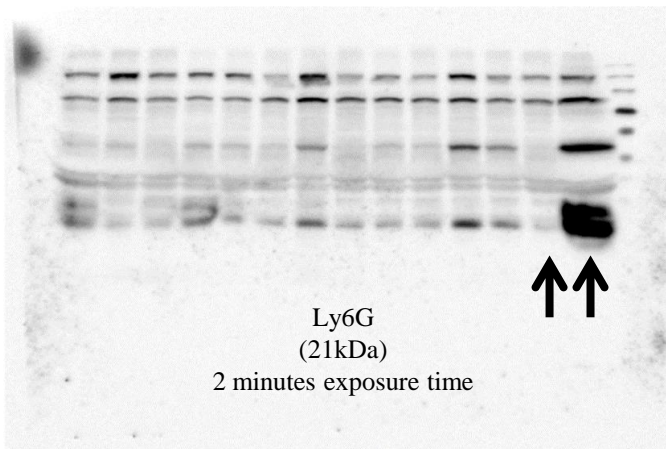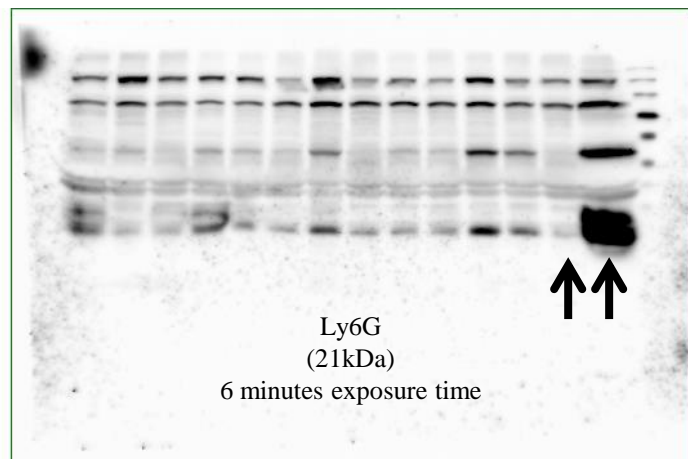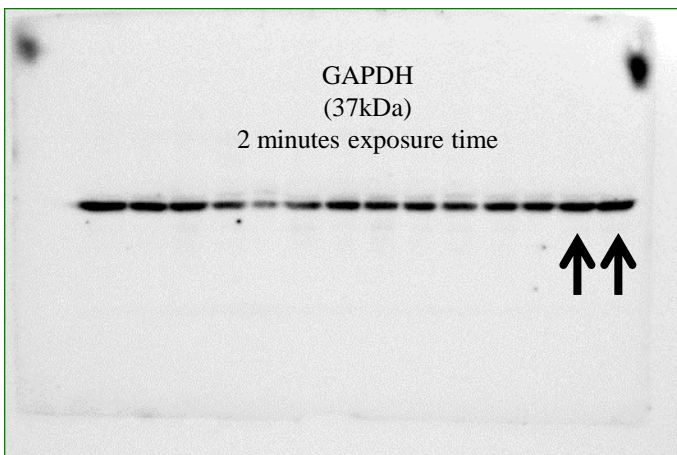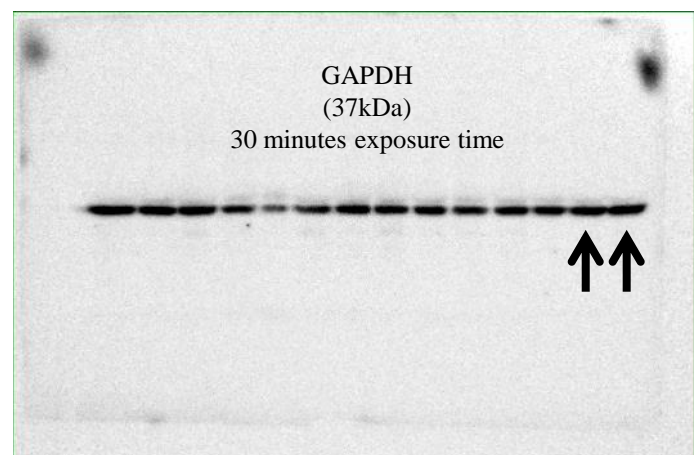

Figure 2

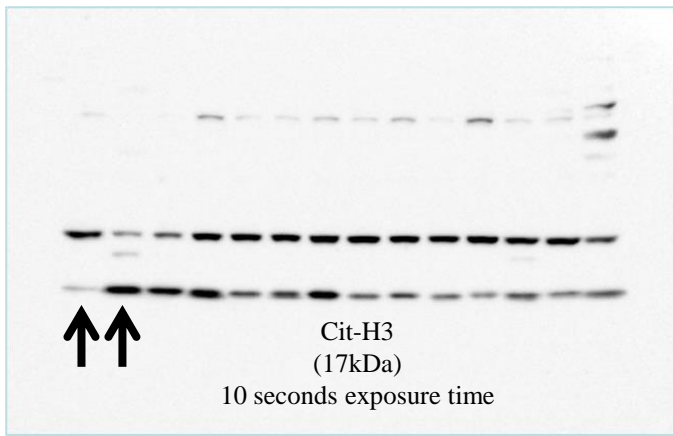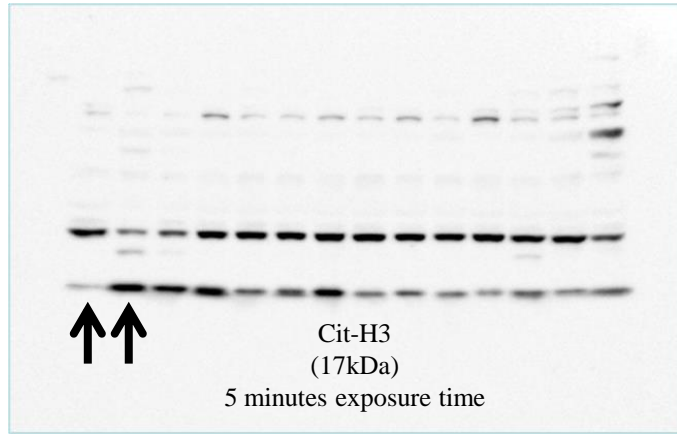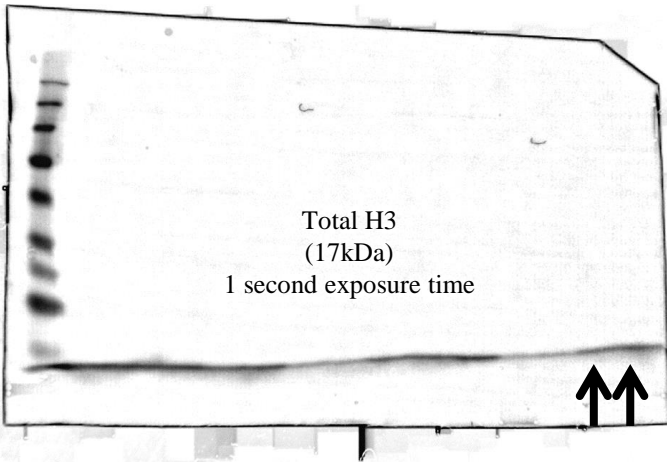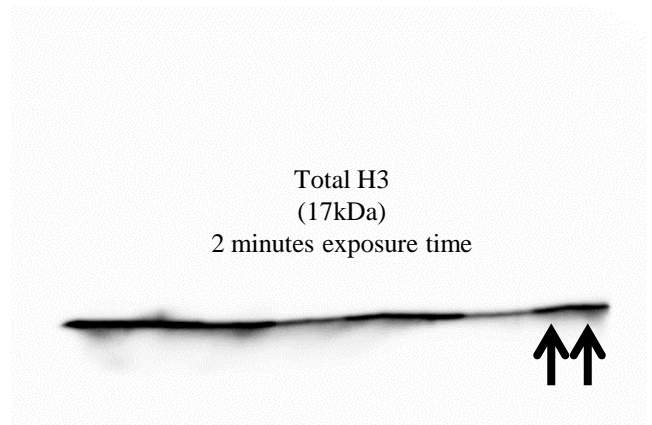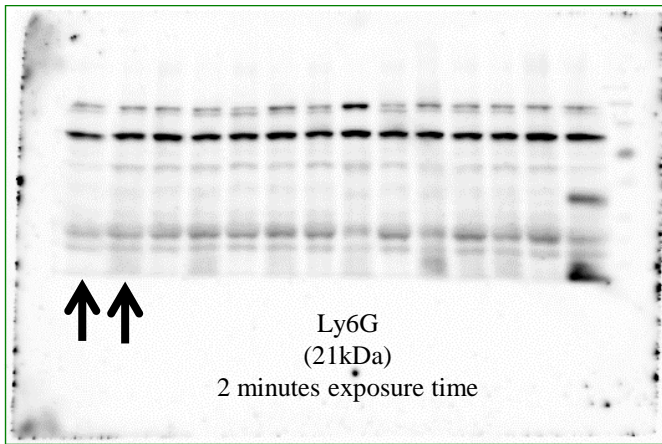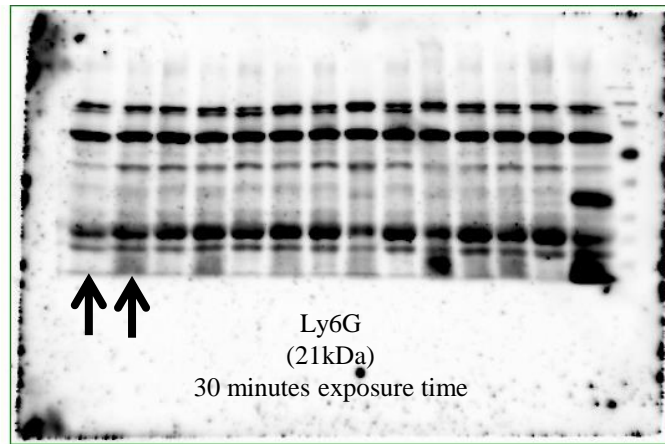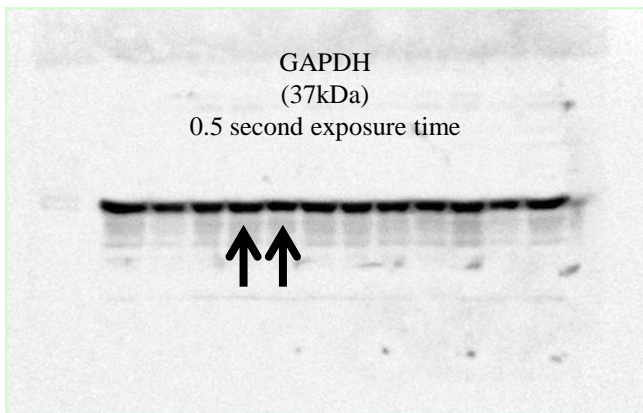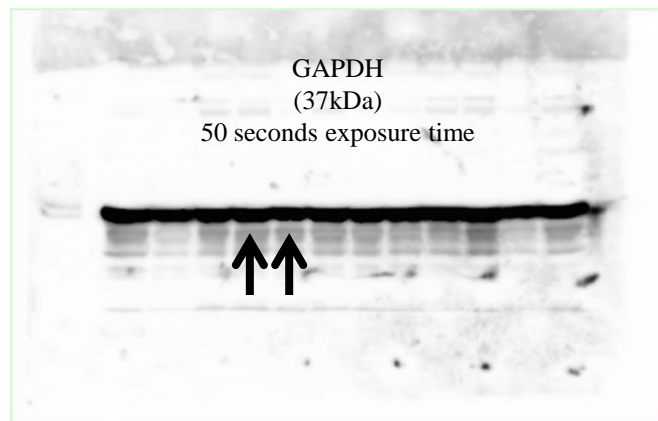

Figure 3

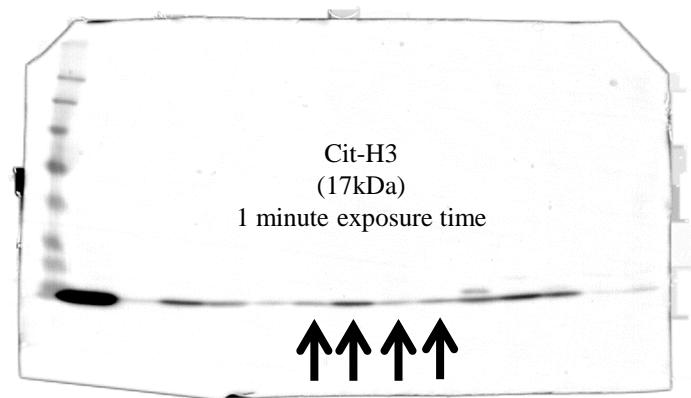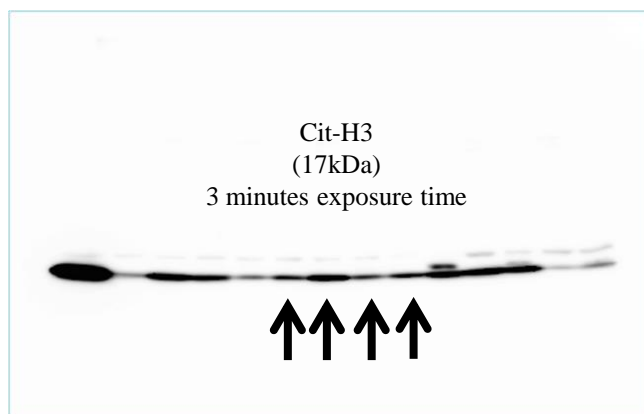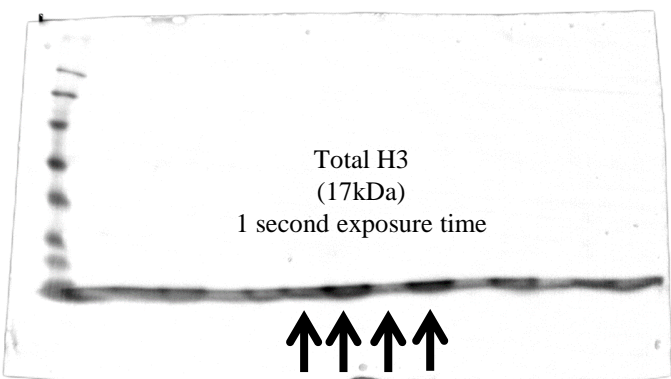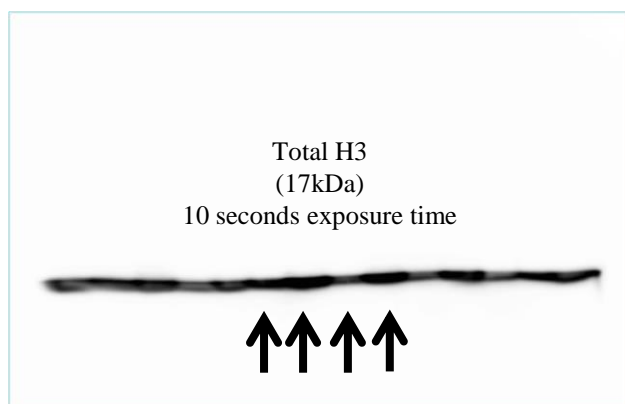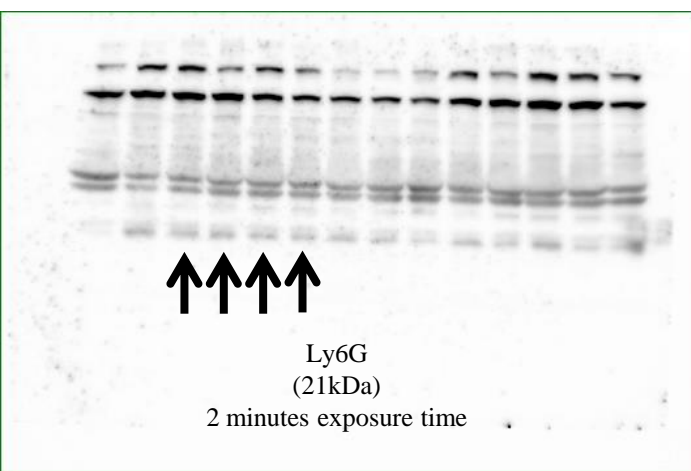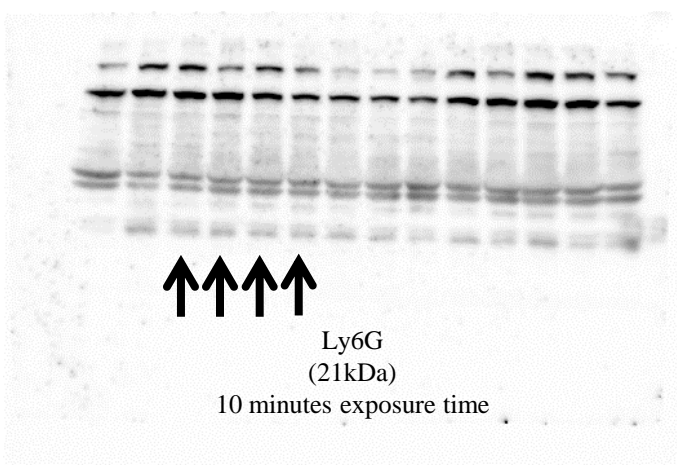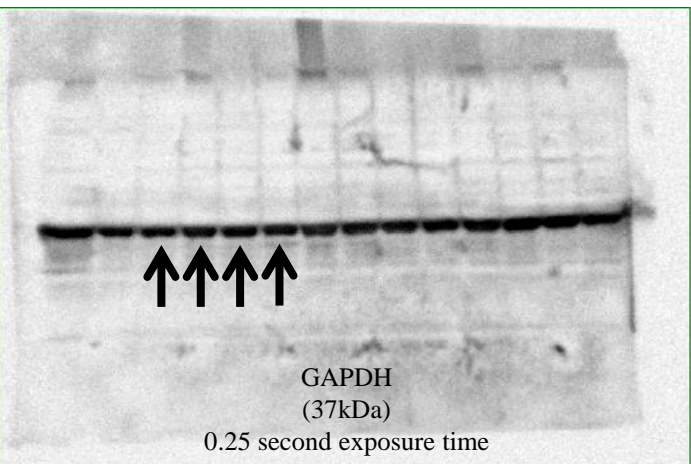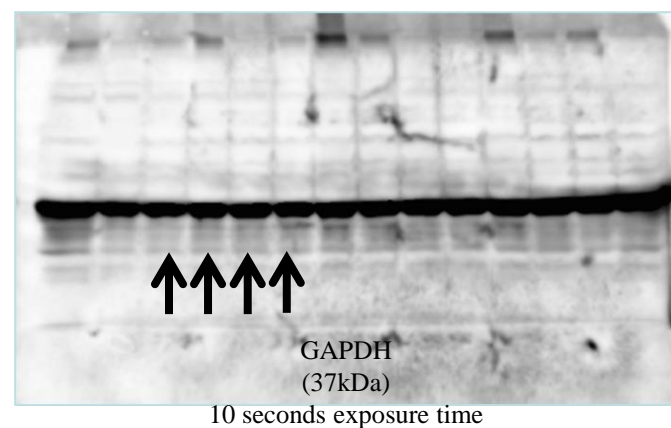

Figure 4

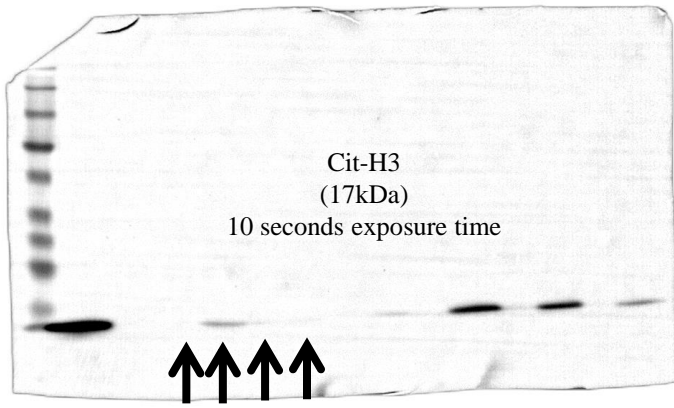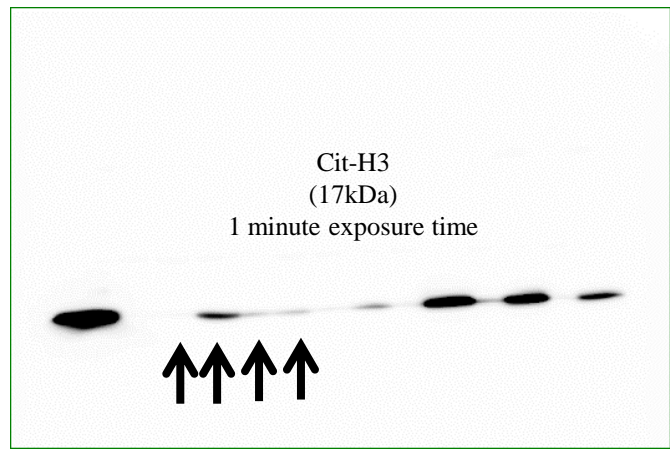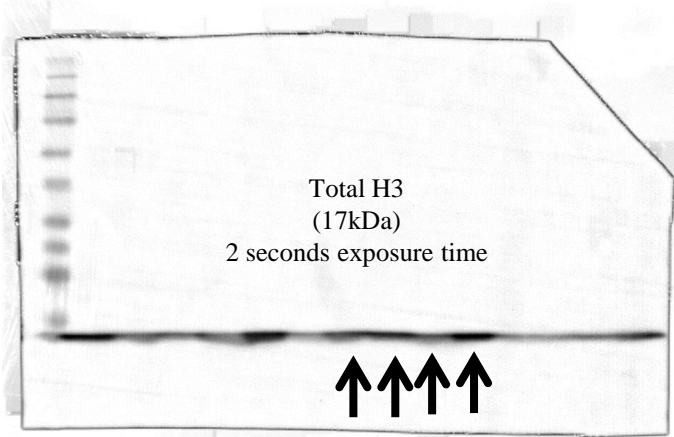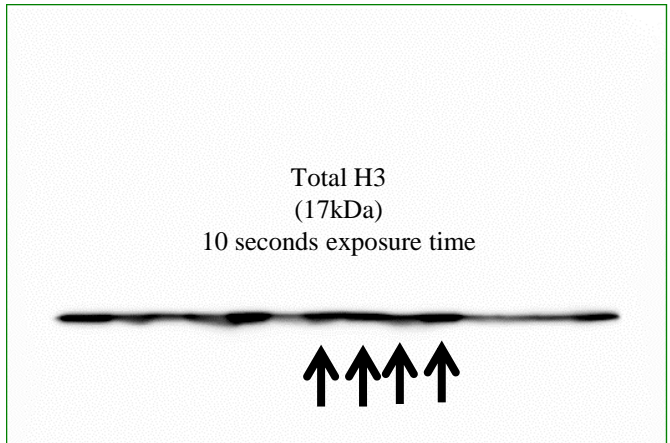

Figure 5

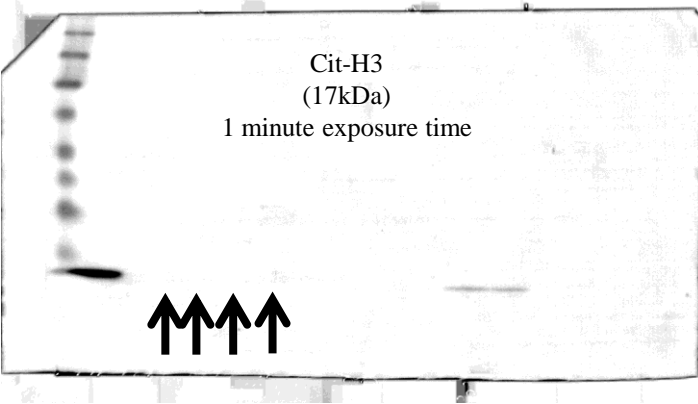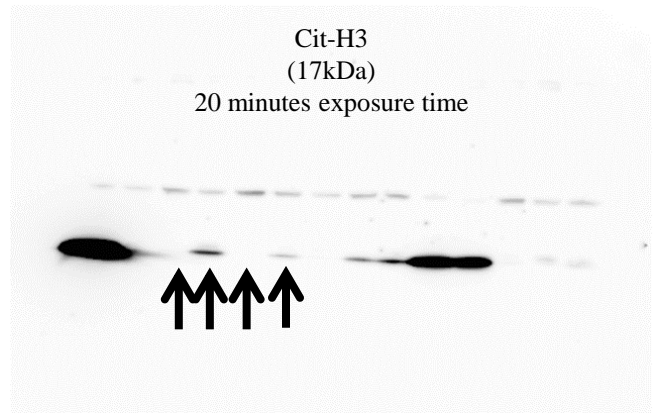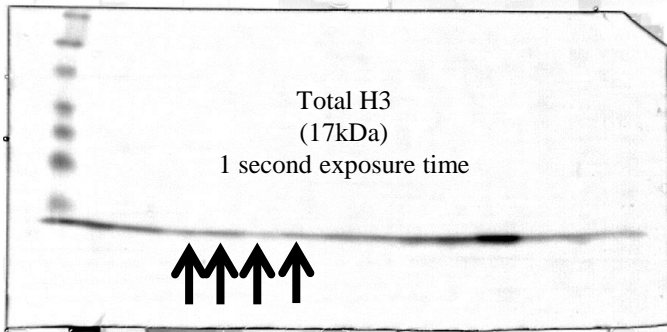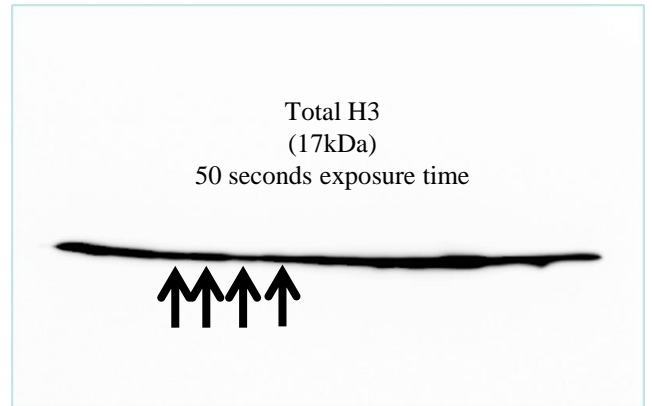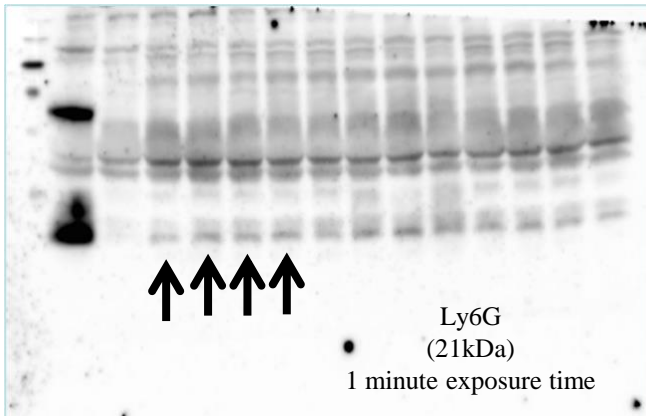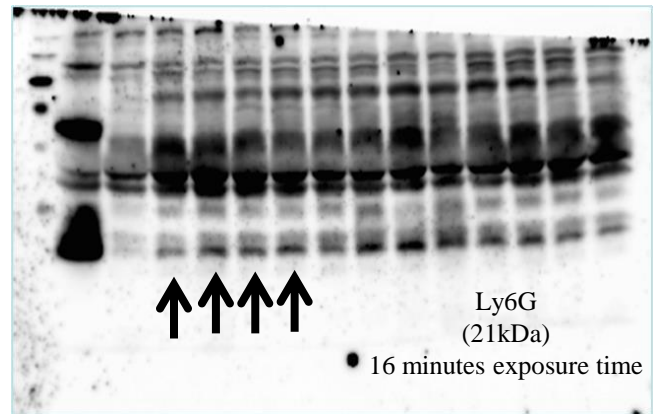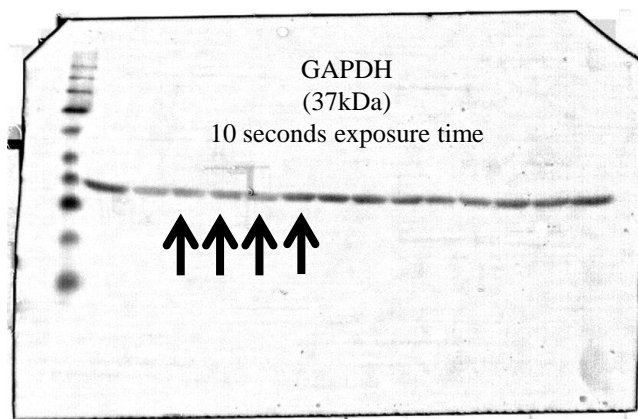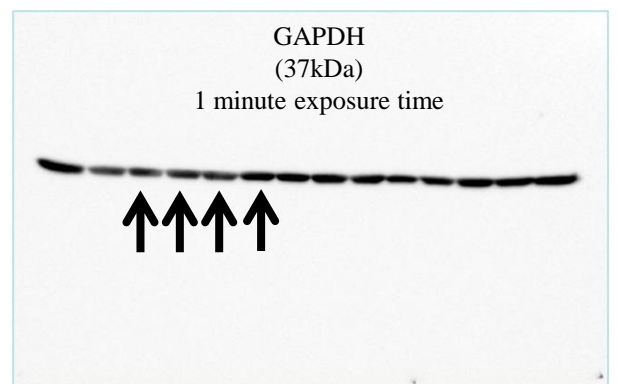

Supplement: 41598_2022_7916_MOESM5_ESM.pdf [file 41598_2022_7916_MOESM5_ESM.pdf]
